# Supplementary material for: Synthesis of a phosphomolybdic acid/nanocrystalline titanium silicalite-1 catalyst in the presence of hydrogen peroxide for effective adsorption-oxidative desulfurization
Source: Royal Society of Chemistry journal article supplement (doi:10.1039/d1nj04652g), 2021-12-29
Supplement: d1nj04652g1.pdf [file d1nj04652g1.pdf]

## Supporting Information

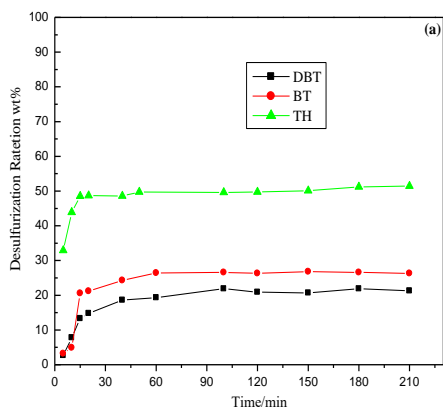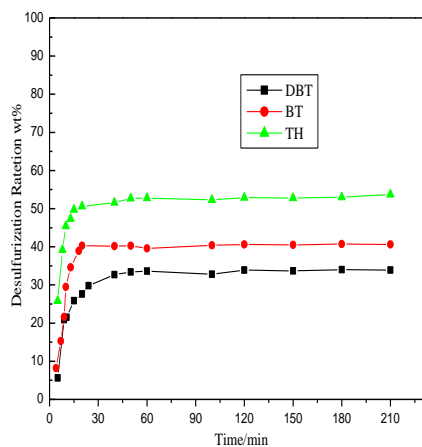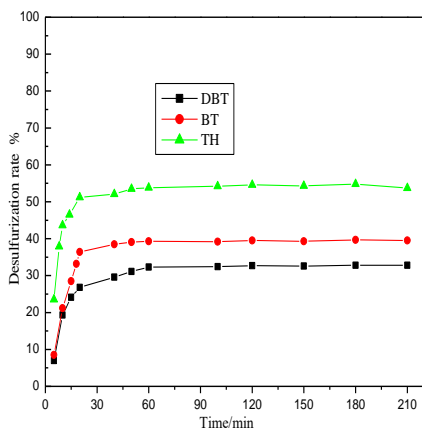

**Fig. S1.** Effect of probe molecule type on catalyst adsorption desulfurization activity a. Nano-TS-1, HPMo-Nano-TS-1, HPMo-H<sub>2</sub>O<sub>2</sub>-Nano-TS-1

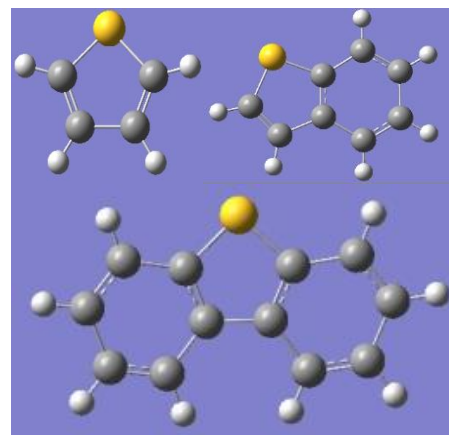

**Fig. S2.** The TH, BT and DBT's structure sketch map

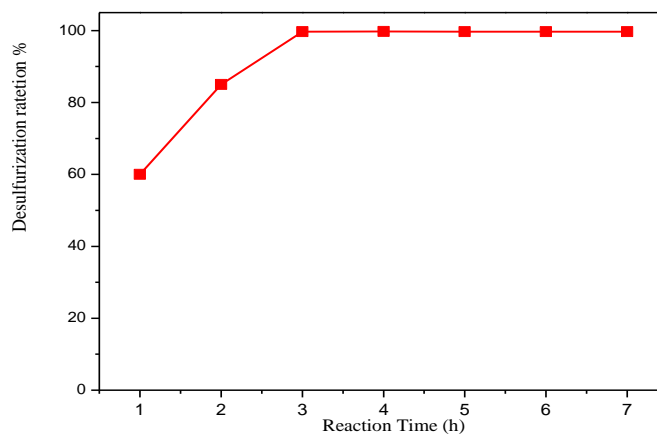

**Fig. S3.** Influence of reaction time on sulfur removal  
Experimental conditions:  $m(\text{catalyst}) = 0.15 \text{ g}$ ,  $\text{mol}(\text{O/S}) = 10$ ,  $V(\text{model oil/ethanol}) = 10.0 \text{ mL}/10.0 \text{ mL}$ .

|                                                |           |           |      |            |
|------------------------------------------------|-----------|-----------|------|------------|
| Name: TS-1                                     |           |           |      |            |
| From: -126.002 ppm                             |           |           |      |            |
| To: -97.781 ppm                                |           |           |      |            |
| Residual Error:2.42e+08                        |           |           |      |            |
| # ppm                                          | Height    | Width(Hz) | L/G  | Area       |
| 1 -106.0                                       | 5831.84   | 473       | 0.00 | 15004.752  |
| 2 -115.9                                       | 92573.99  | 490       | 0.00 | 246609.955 |
| 3 -118.5                                       | 18020.80  | 433       | 0.62 | 54940.106  |
| Name: HPMo/TS-1                                |           |           |      |            |
| From: -126.629 ppm                             |           |           |      |            |
| To: -98.063 ppm                                |           |           |      |            |
| Residual Error:1.13e+08                        |           |           |      |            |
| # ppm                                          | Height    | Width(Hz) | L/G  | Area       |
| 1 -105.9                                       | 8173.37   | 587       | 0.94 | 37806.809  |
| 2 -115.7                                       | 103435.75 | 476       | 0.00 | 267810.821 |
| 3 -118.7                                       | 24859.62  | 269       | 0.56 | 46211.037  |
| Name: H <sub>2</sub> O <sub>2</sub> -HPMo/TS-1 |           |           |      |            |
| From: -126.987 ppm                             |           |           |      |            |
| To: -97.973 ppm                                |           |           |      |            |
| Residual Error:4.47e+08                        |           |           |      |            |
| # ppm                                          | Height    | Width(Hz) | L/G  | Area       |
| 1 -106.0                                       | 7769.61   | 586       | 0.61 | 31909.436  |
| 2 -115.7                                       | 100616.27 | 461       | 0.00 | 252432.969 |
| 3 -118.8                                       | 57821.09  | 132       | 0.67 | 54878.734  |

**Fig. S4.** Integral data of the <sup>29</sup>Si NMR spectrum of catalysts
